# 1 Theropod dinosaurs had primate-like numbers of telencephalic neurons

2

3 Suzana Herculano-Houzel

4 Department of Psychology, Department of Biological Sciences, Vanderbilt Brain Institute,

5 Vanderbilt University, Nashville, TN 37240

6

## 7 **Abstract**

8         Understanding the neuronal composition of the brains of dinosaurs and other fossil  
9 amniotes would offer fundamental insight into their behavioral and cognitive capabilities, but  
10 brain tissue is only rarely fossilized. However, when the bony brain case is preserved, the volume  
11 and therefore mass of the brain can be estimated with computer tomography; and if the scaling  
12 relationship between brain mass and numbers of neurons for the clade is known, that  
13 relationship can be applied to estimate the neuronal composition of the brain. Using a recently  
14 published database of numbers of neurons in the telencephalon of extant sauropsids (birds,  
15 squamates and testudines), here I show that the neuronal scaling rules that apply to these  
16 animals can be used to infer the numbers of neurons that composed the telencephalon of  
17 dinosaur, pterosaur and other fossil sauropsid species. The key to inferring numbers of  
18 telencephalic neurons in these species is first using the relationship between their estimated  
19 brain and body mass to determine whether bird-like (endothermic) or squamate-like  
20 (ectothermic) rules apply to each fossil sauropsid species. This procedure shows that the notion  
21 of “mesothermy” in dinosaurs is an artifact due to the mixing of animals with bird-like and  
22 squamate-like scaling, and indicates that theropods such as *Tyrannosaurus* and *Allosaurus* were  
23 endotherms with baboon- and monkey-like numbers of telencephalic neurons, respectively,  
24 which would make these animals not only giant but also long-lived and endowed with flexible  
25 cognition, and thus even more magnificent predators than previously thought.

26

## 27 **Introduction**

28         The modern mammal and bird-rich amniote fauna arose from the opportunity created by  
29 the demise, in a catastrophic astronomical event, of the giant archosaur species that dominated  
30 the Earth during the Mesozoic (Alvarez et al., 1980; Bininda-Emonds et al., 2007; Yu et al., 2021).  
31 Until then, sauropodomorphs (the long-necked, plant-eating, quadruped dinosaurs), theropods

32 (the bipedal, carnivorous dinosaurs) and ornithischians (the sometimes armored, plant-eating  
33 dinosaurs; Langer et al., 2017) were the largest animals on land. They also had the largest brains  
34 amongst land animals at the time, approaching 200 g (the size of a lion's brain) in  
35 sauropodomorphs like *Giraffatitan brancai* (*Brachiosaurus*) and surpassing that in theropods such  
36 as *Tyrannosaurus rex* (up to 343 g; Hurlburt, 1996; Balanoff et al., 2013; Table 1). However, the  
37 fact that dinosaurs were sometimes gigantic has been used to imply that their rather large brains  
38 were actually undersized for their bodies, giving those animals very low encephalization  
39 quotients (EQ) – the first metric to set humans apart from other species, above all others, with a  
40 much larger brain than expected for our body size (Jerison, 1973). With low EQs, large dinosaurs  
41 could presumably not be that cognitively competent (Jerison, 1973; Hopson, 1977; Knoll and  
42 Schwarz-Wings, 2009; Rowe et al., 2011; Ksepka et al., 2020; Balanoff et al., 2013). Rather, it was  
43 small theropods such as troodontids, with relatively larger brains and thus higher EQs, that were  
44 considered to be “smarter” (Jerison, 1973).

45         The EQ is the ratio between the actual brain volume (or mass; these variables are  
46 interchangeable, given the specific density of the brain of approximately 1.0 mg/ml) and the brain  
47 volume mathematically expected for a species of a given body mass (Jerison, 1973). Calculating  
48 the EQ for a species is done under the assumption that brain and body mass are universally  
49 correlated across a wide range of species; interpreting the EQ as informative of cognitive  
50 capacities, in turn, assumes that brain mass is a universal predictor of numbers of neurons in the  
51 brain, and in the pallium (cerebral cortex, in mammals) in particular, the brain structure that most  
52 decidedly confers flexibility and complexity to animal behavior (Jerison, 1973). The problem is  
53 that while those were reasonable assumptions until the 2000s, we now know that they are both  
54 incorrect.

55         Recent analyses of large datasets show that brain and body size evolve separately in both  
56 mammalian (Bertrand et al., 2022) and bird (Ksepka et al., 2020) evolution, making body size an  
57 unreliable universal predictor of brain mass. In parallel, a new line of investigation created in my  
58 lab based on an original non-stereological method to count brain cells, the isotropic fractionator  
59 (Herculano-Houzel and Lent, 2005), allowed the realization that there is no mandatory, universal  
60 relationship between body mass and numbers of brain neurons, not even in the brainstem

61 structures that operate the body (Herculano-Houzel et al., 2014, 2015a; Herculano-Houzel,  
62 2017). Additionally, there is no universal relationship between the size of a brain structure and  
63 its numbers of neurons; different scaling relationships apply to different clades of mammals and  
64 birds (Herculano-Houzel et al., 2014; Herculano-Houzel, 2016), while scaling relationships are  
65 mostly shared across reptiles (Kverkova et al., 2022; Herculano-Houzel, 2022). As a result of the  
66 lack of a universal correlation between body mass and brain composition, when numbers of  
67 neurons (the signal processing units of circuits) should be the limiting factor that determines the  
68 computational capacity of a network (Williams and Herrup, 1980), bringing body mass into  
69 comparisons of brain size across species of different clades is more than uninformative; it  
70 muddles interpretation, by bringing a confounding factor into the mix.

71 Rather, simple, absolute numbers of neurons in the pallium (organized as a cortex in  
72 mammals) are a much better proxy for cognitive abilities than brain or pallial size, whatever the  
73 size of the body (Herculano-Houzel, 2017). These are the signal processing units that make  
74 behavior flexible and complex and should thus constitute a primary determinant of signal  
75 processing capacity (Williams and Herrup, 1980; Herculano-Houzel, 2017; Ströckens et al., 2022).  
76 Absolute numbers of pallial neurons are a better predictor of flexible cognitive control than brain  
77 mass or EQ across birds and primates alike (Herculano-Houzel, 2017), and, across bird species,  
78 they are a great predictor of innovation rate (Sol et al., 2022). It thus follows that understanding  
79 the capability for behavioral and cognitive flexibility of the extinct species that once dominated  
80 the Earth's fauna requires going beyond the veil of brain and body size and gaining direct  
81 understanding of the numbers of neurons that composed the pallium of those animals. That  
82 understanding can be reached once the scaling relationship between brain size and numbers of  
83 neurons for species in a given clade is known, which makes brain size a reliable proxy of numbers  
84 of neurons in that clade. In particular, numbers of pallial, or telencephalic, neurons in extant  
85 species can be estimated from brain size by clade-specific allometric power functions with  $r^2$   
86 values of typically 0.9, that is, which provide estimates with about 90% reliability (Herculano-  
87 Houzel, 2019a). Using this expedient, we have previously been able to infer the numbers of  
88 neurons that composed the brain of prehistoric hominin species (Herculano-Houzel and Kaas,  
89 2011) and fossil mammals (Herculano-Houzel et al., 2011).

90           How to determine the scaling relationships that applied to fossil species, when brain  
91 tissue is not preserved in the fossil record? Brain mass of dinosaur species can be estimated with  
92 CT or micro-CT of extant or fossilized skulls (Hulburt, 1996; Knoll et al., 1999; Witmer et al., 2003;  
93 Balanoff et al., 2013). In these cases, the numbers of neurons that composed their brains, and  
94 their telencephalon in particular, can be estimated if one can determine the applicable predictive  
95 equations relating numbers of neurons to brain mass. Dinosaurs and pterosaurs (together with  
96 turtles and crocodylians) were archosaurs, the sister clade to modern squamates, which are  
97 ectothermic sauropsids; but living birds, which are endothermic sauropsids, are surviving  
98 dinosaurs. Thus, the alternative hypotheses tested here are that pterosaur and dinosaur brains  
99 were either composed like ancestral, and modern, ectothermic sauropsid brains, or had already  
100 shifted to the composition of modern, endothermic, early-branching bird brains (Herculano-  
101 Houzel, 2022).

102           Here I determine whether ectothermic or endothermic sauropsid scaling rules most likely  
103 applied to different dinosaur (and pterosaur) species, and use the allometric scaling equations  
104 that apply to the brain structures of modern birds and non-avian sauropsids to predict the  
105 numbers of neurons that composed the brains of fossil dinosaurs and pterosaurs based on their  
106 brain volumes. These allometric scaling equations describe the relationship between brain  
107 structure mass and numbers of neurons, determined using the isotropic fractionator (Herculano-  
108 Houzel and Lent, 2005). This method, which consists of turning brains or brain structures into a  
109 homogeneous soup of floating cell nuclei that allows the fast, unbiased, and reproducible  
110 estimation of how many neuronal and non-neuronal cells composed those structures (Herculano-  
111 Houzel et al., 2015b), has by now been applied to over 200 species of mammals, birds, and non-  
112 avian sauropsids (Kverkova et al., 2022). While the resulting dataset did not separate the pallial  
113 from the subpallial structures that together compose the telencephalon of non-avian sauropsids,  
114 it did establish that the vast majority of telencephalic neurons are found in the pallium of early-  
115 branching birds; thus, numbers of telencephalic neurons in the dataset offer a good  
116 approximation for the number of pallial neurons (though the subpallium also contributes to  
117 flexible behavior; Boot et al., 2017). In contrast to the recent initial analysis of the full dataset  
118 which focused on relationships between numbers of neurons and body mass (Kverkova et al.,

119 2022), here I concentrate on the clade-specific relationships between telencephalic and brain  
120 mass and numbers of telencephalic neurons in the different clades of living avian- and non-avian  
121 sauropsids in search of establishing what relationships putatively applied to fossil species, which  
122 I then use to estimate numbers of telencephalic neurons in select species with known brain  
123 volume and mass.

124

## 125 **Methods**

126 All data on numbers of telencephalic neurons, brain and telencephalic mass, and body  
127 mass for 174 extant sauropsid species (avian and non-avian) used to calculate the scaling  
128 relationships in Figure 1 were taken from Kverkova et al. (2022). All power functions were  
129 calculated using least-squares regression of log-transformed values using the JMP 16 software  
130 package (Carey, NC). Power functions were calculated separately for different groups of birds, as  
131 detailed in the results (Accipitriformes, n=4 species; Anseriformes, n= 7; Columbiformes, n=5;  
132 Falconiformes, n=3; Galliformes, n=9; Palaeognathae, n=6 species; Passeriformes, n=13;  
133 Psittaciformes, n=11; Strigiformes, n=7); and for all non-avian sauropsids in the dataset (88  
134 squamates, 19 testudines and 1 crocodylian species; Kverkova et al., 2022). Particular emphasis  
135 was placed on the early-branching (“pre-K-Pg”) bird species, which in this dataset belong to  
136 Palaeognathae, Galliformes, Anseriformes and Collumbiformes, which share scaling relationships  
137 (see Figure 1, and Herculano-Houzel, 2022). Thus, all scaling relationships reported pertain to a  
138 group of species that belong to closely related clades that share a scaling relationship amongst  
139 themselves. *Within* each group, I chose to not adjust the scaling exponent for phylogenetic  
140 relatedness in the dataset because the point of calculating these scaling relationships was not to  
141 study phylogeny, but to use the mathematical functions to make predictions from brain mass, in  
142 which case the desired scaling relationship is the one that applies to the raw data, with no  
143 modifications introduced that would distort the mathematical reality of the relationships  
144 between the physical entities (structure mass) and (number of neurons).

145 Absolute estimated brain mass (not simply endocranial volume) and body mass values in  
146 fossil pterosaur and dinosaur species shown in Figure 2 were collected from four studies that  
147 compiled estimates from CT studies of endocranial volume (Table 10 in Hulburt, 1996; Witmer et  
148 al., 2003; Hulburt et al., 2013; Balanoff et al., 2013). Different brain-to-endocast fractions by

149 definition will impact the estimated brain mass or volume (Knoll et al., 2022); thus, care was  
150 taken to use explicitly reported estimates for brain mass, whether or not that matched the  
151 endocranial volume. Estimates for theropod and pterosaur species consider that theropod and  
152 pterosaur brains filled the endocranial cavity (Balanoff et al., 2013; Witmer et al., 2003), whereas  
153 Hurlburt's estimates for all dinosaurs except small theropods considered that brain mass was half  
154 that of endocast volume (Hurlburt, 1996, p. 147). Where available, specimen numbers are  
155 provided in Table 1 (they were not reported in Hurlburt's 1996 dataset). Where more than one  
156 estimate was available for a species, all values are plotted so as to allow the evaluation of the  
157 impact of specimen and methodological variability, as well as the range of body and brain size  
158 combinations. I note that the taxonomy of several fossil species has been updated since  
159 Hurlburt's data compilations that I use in Table 1. For the sake of making the present dataset  
160 transparent and readily verifiable by other researchers and useful to them, and because I am not  
161 a paleontologist but a neuroscientist using paleontological data, I chose to preserve in Table 1  
162 the original names under which the data were originally reported by the authors.

163

164

## 165 **Results**

166 Figure 1a shows that the neuronal scaling rules that apply to the telencephalon of modern  
167 birds and non-avian sauropsids are clearly distinct. For a similar telencephalic mass (which occurs  
168 in the largest non-avian sauropsids and the smallest birds), early-branching bird clades in the  
169 dataset (Palaeognathae, Galliformes, Anseriformes, and also Columbiformes, in red), which arose  
170 before the K-Pg boundary (henceforth, pre-K-Pg birds; Brusatte et al., 2015), have ca. 5 times as  
171 many telencephalic neurons as non-avian sauropsids (in green), and the post-K-Pg-branching  
172 Passeriformes, Psittaciformes and Strigiformes clades have even more telencephalic neurons (in  
173 black). For instance, the zebra finch has 55 million telencephalic neurons whereas the Sudan  
174 plated lizard has only 14 million, though both have a telencephalon of ca. 0.3 g. Strikingly, there  
175 is very little overlap in numbers of telencephalic neurons between birds and non-avian  
176 sauropsids, a distinction that I have hypothesized to result from the increased oxidative rates  
177 that make endothermy possible in birds compared to other sauropsids (Bennett and Ruben,

178 1979) rather than from endothermy itself (Kverkova et al., 2022; Herculano-Houzel et al., 2022).  
179 Figure 1b shows that endothermic sauropsids (i.e., birds) do have larger brains compared to  
180 ectothermic sauropsids of a similar body mass, but again in a clade-specific manner, such that  
181 bird species belonging to post-K-Pg clades (songbirds, parrots, and owls) have even larger brain  
182 mass for a similar body mass.

183 Together, the distinction between bird clades in Figures 1a and 1b shows that a shift to  
184 endothermy cannot be the sole cause of increased brain mass and numbers of telencephalic  
185 neurons in birds relative to body mass (Herculano-Houzel, 2022; Gillooly and McCoy, 2014), since  
186 brain mass increases further relative to body mass in the post-K-Pg songbirds, parrots and owls  
187 compared to the pre-K-Pg birds. Importantly, these findings establish that comparisons across  
188 species and clades for where brain scaling is involved cannot treat “birds” as a single entity, as  
189 has been standard in the field (Balanoff et al., 2013). However, amongst non-avian sauropsid  
190 clades, neuronal scaling rules are much more uniform (Herculano-Houzel, 2022), and for the  
191 purposes of this study, all extant non-avian sauropsids in the dataset (88 squamates, 19  
192 testudines and 1 crocodylian species) can be considered to share the scaling rules of interest,  
193 which are clearly distinct from the scaling rules that apply to extant pre-K-Pg birds (Figure 1a).

194 Expressing the number of telencephalic neurons in the brain as a function of brain mass  
195 shows that within a clade, brain mass has strongly predictive power to arrive at estimates of  
196 numbers of telencephalic neurons in a brain of known mass, once the neuronal scaling rules that  
197 presumably apply are known. Figure 1c shows that clearly different predictive scaling rules apply  
198 to extant pre-K-Pg birds and to non-avian sauropsids, with non-overlapping 95% prediction  
199 intervals across the entire range of bird-like brain sizes. Specifically, these distinct power laws are  
200 such that over 80% of the variation in numbers of telencephalic neurons in non-avian sauropsid  
201 species, and over 90% in pre-K-Pg birds, can be accounted for by the variation in brain mass, if  
202 clade identity is respected.

203

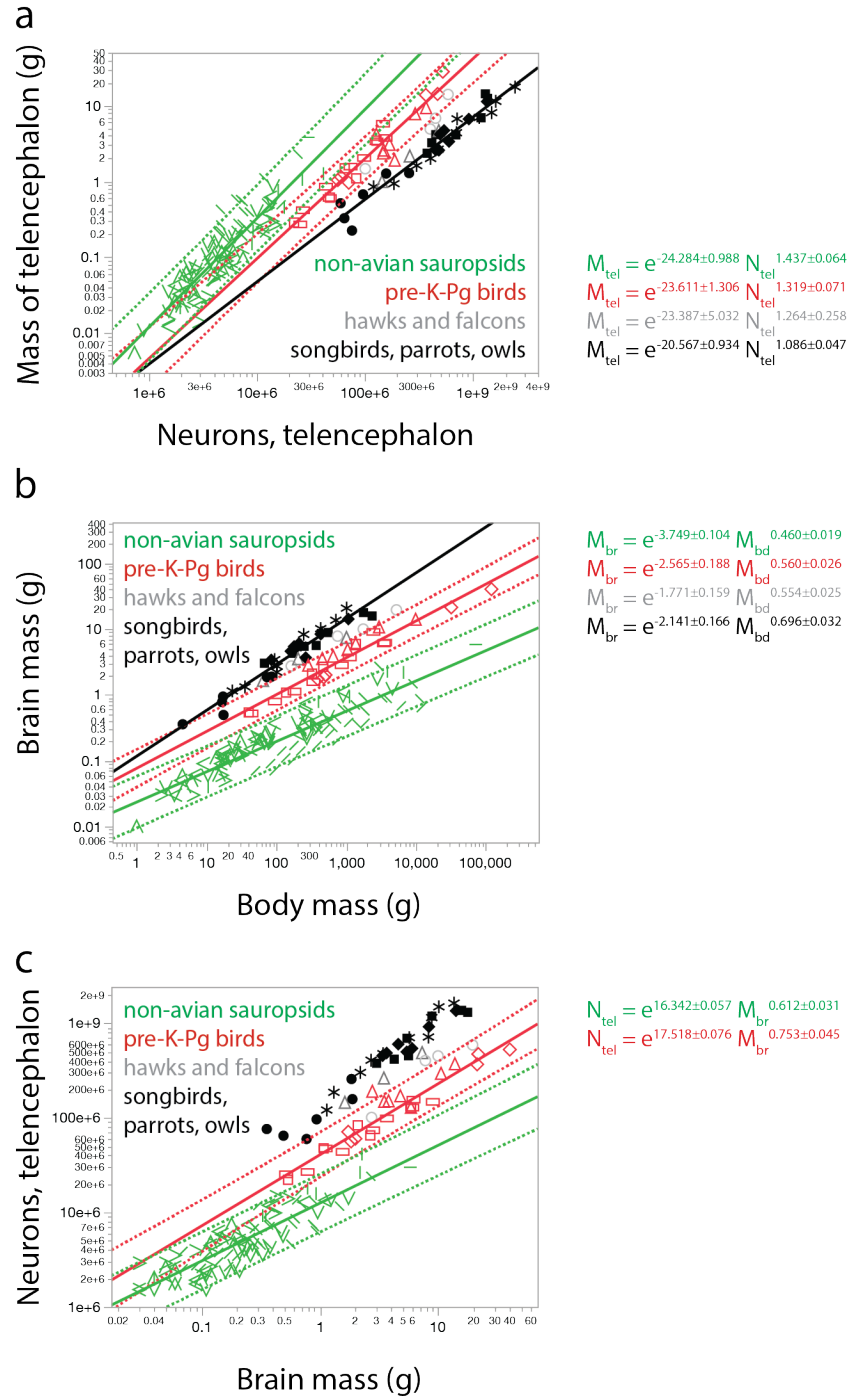

204

205

206 **Figure 1. Scaling relationships that apply to extant avian and reptile species. A,** clade-specific scaling of  
 207 telencephalic mass ( $M_{tel}$ ) with numbers of telencephalic neurons ( $N_{tel}$ ) distinguishes pre-K-Pg bird clades  
 208 (Palaeognathae, red lozangles; Galliforms, red rectangles; Anseriformes, red triangles; Columbiformes,  
 209 red squares) from post-K-Pg bird clades (Falconiformes, grey triangles; and Accipitriformes, grey circles,



210 i.e. hawks and falcons; and Passeriformes, black circles; Psittaciformes, black asterisks; and Strigiformes,  
211 black squares, i.e. songbirds, parrots, and owls; and non-avian sauropsids (including Testudines and  
212 Crocodylia). Power functions are indicated next to the graph for each group (non-avian sauropsids in green,  
213 with different symbols for the different clades in Kverková et al. (2022),  $r^2=0.826$ ,  $p<0.0001$ ,  $n=108$ ; pre-  
214 K-Pg birds in red,  $r^2=0.933$ ,  $p<0.0001$ ,  $n=27$  species; Accipitriformes and Falconiformes, fit not plotted for  
215 clarity,  $r^2=0.828$ ,  $p=0.0045$ ,  $n=7$  species; Passeriformes, Psittaciformes and Strigiformes in black,  $r^2=0.949$ ,  
216  $p<0.0001$ ,  $n=31$  species). **B**, clade-specific scaling of brain mass with body mass similarly distinguishes pre-  
217 K-Pg bird clades (Palaeognathae, Galliforms, Columbiformes, Anseriformes) from other, later-branching  
218 bird clades (Falconiformes and Accipitriformes; and Passeriformes, Psittaciformes, and Strigiformes), and  
219 non-avian sauropsids. Power functions as in A: non-avian sauropsids plotted in green,  $r^2=0.842$ ,  $p<0.0001$ ,  
220  $n=108$  species; pre-K-Pg birds plotted in red,  $r^2=0.948$ ,  $p<0.0001$ ,  $n=27$  species; Accipitriformes and  
221 Falconiformes, in grey, fit not plotted for clarity,  $r^2=0.990$ ,  $p<0.0001$ ,  $n=7$  species; and Passeriformes,  
222 Psittaciformes and Strigiformes plotted in black,  $r^2=0.944$ ,  $p<0.0001$ ,  $n=31$  species. **C**, clade-specific  
223 predictive relationships for estimating numbers of telencephalic neurons from brain mass for pre-K-Pg  
224 birds and non-avian sauropsids. Power functions are indicated next to the graph for pre-K-Pg birds (in red;  
225  $r^2=0.918$ ,  $p<0.0001$ ,  $n=27$  species) and for non-avian sauropsids (in green:  $r^2=0.791$ ,  $p<0.0001$ ,  $n=108$   
226 species). All data from Kverkova et al., 2022.

227

228 The predictive equations shown in Figure 1c can be used to infer the numbers of  
229 telencephalic neurons that composed the brains of dinosaur, pterosaur, and other fossil  
230 sauropsid species provided that these species are found to conform to the scaling rules that apply  
231 to either modern pre-K-Pg birds or non-avian sauropsids. Figure 2, using data compiled from the  
232 literature (Table 1), shows that the scaling of brain mass with body mass can indeed provide a  
233 distinguishing criterion across dinosaur species. Standard practice in the field has been to assume  
234 that a single scaling relationship applies homogeneously across mixed dinosaur clades (Jerison,  
235 1973; Balanoff et al., 2013; Grady et al., 2014). Figure 2a confirms that a highly significant single  
236 scaling relationship can indeed be fit to the ensemble of the fossil species sampled, with a 95%  
237 prediction interval that includes all but one species (Figure 2a), with an exponent of  $0.455\pm 0.028$   
238 ( $r^2=0.857$ ,  $p<0.0001$ ) that is similar to the exponent that applies to extant non-avian sauropsids  
239 only ( $0.460\pm 0.019$ ,  $r^2=0.842$  in Figure 1b) but with a significantly larger intercept of  $e^{-2.327\pm 0.338}$   
240 compared to the  $e^{-3.749\pm 0.104}$  of modern such species. If this joint scaling relationship intermediate

241 between living non-avian sauropsids and birds truly applied across all dinosaurs, as calculated  
242 previously (Balanoff et al., 2013), and these diverse species shared a single scaling relationship  
243 between brain and body mass (for example, if they were “mesothermic”, as once suggested by a  
244 similar expedient of analyzing dinosaur species together regardless of clade; Grady et al., 2014),  
245 then it would not be justified to apply the neuronal scaling rules of either modern birds or non-  
246 avian sauropsids to these fossil species.

247 In contrast, Figure 2b shows that individual dinosaur and pterosaur specimens clearly  
248 conform to the brain x body scaling rules that apply to either ectothermic or pre-K-Pg  
249 endothermic extant sauropsids. Both *Archaeopteryx*, the earliest avian species of known brain  
250 and body mass, and a non-identified “protoavis” (Hulburt, 1996; filled red circles) conform to the  
251 scaling relationship that applies to modern pre-K-Pg birds, which originated within Jurassic  
252 theropods (Brusatte et al., 2015), with brains significantly larger than expected for a modern  
253 reptile of similar body mass. Likewise, the majority of theropod dinosaur species of known brain  
254 and body mass (filled pink circles) conform to the brain vs body mass relationship that applies to  
255 modern pre-K-Pg birds, with the exception of *Shuvuuia deserti* (with brain mass just below the  
256 prediction interval for pre-K-Pg birds) and *Tsaagan mangas* (with the brain mass expected for a  
257 modern ectothermic sauropsid of similar body mass; unfilled pink circles). Conversely, most  
258 sauropodomorph dinosaurs in the dataset had the brain mass expected for a modern ectothermic  
259 sauropsid of their body mass (unfilled green circles). Ornithischian (blue circles) and pterosaur  
260 species (black circles), in turn, align either with endothermic pre-K-Pg birds (filled circles) or  
261 ectothermic sauropsids (unfilled circles) in their brain vs body mass relationship, depending on  
262 the species (Figure 2b, Table 1). *Protoceratops* (filled blue circle), in particular, approached the  
263 distribution of modern pre-K-Pg birds. Thus, the comparison of the brain vs body mass  
264 relationships of the sampled fossil species with those of modern ectothermic and endothermic  
265 pre-K-Pg sauropsids suggests that the neuronal scaling rules shared by modern ectothermic  
266 sauropsid species also applied to the telencephalon of all non-theropod fossil species of  
267 sauropsids, with the exception of some pterosaur and ornithischian species (filled data points in  
268 Figure 2b), whereas theropods as a whole already had neuronal scaling rules similar to those of  
269 modern, endothermic pre-K-Pg sauropsids, according to the cladogram in Figure 2d. Figure 3a

270 shows how the brain x body mass relationship of fossil avian and non-avian theropods matches  
271 that of extant pre-K-Pg bird species (and, in comparison, primates have much larger brains for a  
272 similar body mass). Figure 3a also shows that despite the extreme difference in body size, the  
273 brain x body mass relationship of fossil sauropodomorphs, several pterosaurs and some  
274 ornithischians match the relationship that applies to extant non-avian sauropsids.  
275

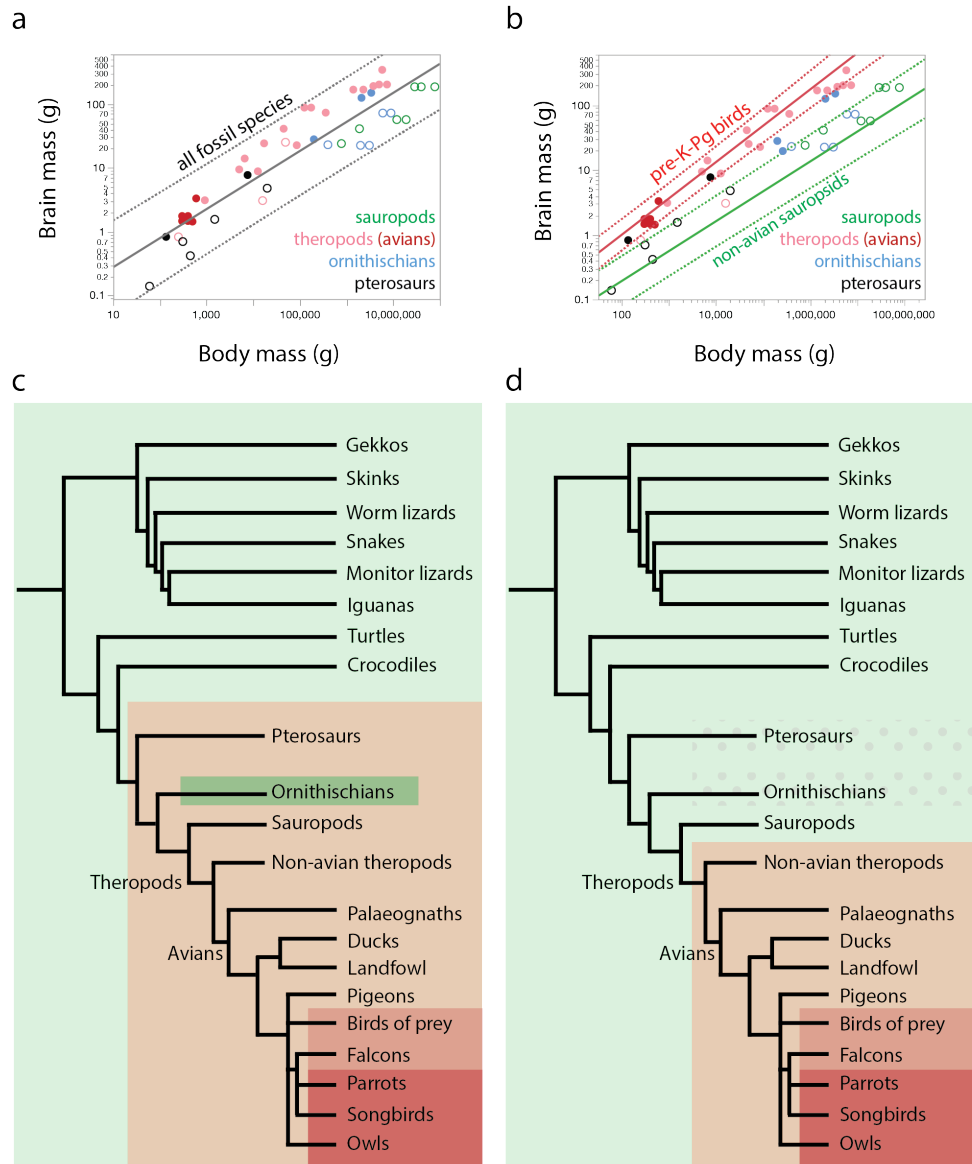

276

277 **Figure 2. Dinosaur and pterosaur species vary in conforming to either modern pre-K-Pg endothermic**  
 278 **(bird) or ectothermic (non-avian sauropsid) scaling relationships between brain and body mass. A, A**

279 single power function  $M_{br} = e^{-2.327 \pm 0.338} M_{bd}^{0.455 \pm 0.028}$  ( $r^2=0.857$ ,  $p<0.0001$ , plotted in grey) can be fit to the  
280 relationship between brain and body mass ( $M_{br}$  and  $M_{bd}$ , respectively) across all the fossil dinosaur and  
281 pterosaur species in the dataset (Table 1), color-coded as indicated in the key. However, most non-avian  
282 theropod species (pink) have larger brain mass than predicted for their body mass, whereas  
283 sauropodomorphs (green) and most pterosaur species (black) have smaller brain mass than predicted by  
284 this joint scaling function, which is consistent with a better account of the distribution by two separate  
285 functions. Filled circles correspond to species that match brain x body mass scaling in pre-K-Pg birds;  
286 unfilled symbols denote species that match brain x body mass scaling in non-avian sauropsids, as in **B**. **B**,  
287 Data points for fossil species in Table 1 plotted onto the fitted power functions shown in Figure 1b that  
288 describe the brain x body mass relationship in modern ectothermic sauropsids and pre-K-Pg endothermic  
289 sauropsids show that most non-avian theropods (pink) and early avians in the dataset have the brain mass  
290 expected for a generic endothermic, pre-K-Pg modern bird that had their body mass, whereas most  
291 sauropodomorphs and pterosaurs have brain mass within the range expected for a modern generic  
292 ectothermic, non-avian sauropsid of their brain mass. Different ornithischian species conform to one of  
293 the other scaling relationship. Power functions, plotted with 95% prediction intervals, are the same as in  
294 Figure 1b. **C**, **D**, schematics of alternate proposals for the evolution of brain vs body mass relationships  
295 that are characteristic of ectothermic (green) or endothermic (shades of red) modern amniotes.  
296 Evolutionary trees based on Wiemann et al. (2022) and Kverkova et al. (2022). **C**, metabolite-based  
297 analysis (Wiemann et al., 2022) predicts that a brain x body scaling relationship similar to that  
298 characteristic of modern endothermic pre-K-Pg birds applied broadly across dinosaur and pterosaur  
299 species, but not in ornithischians. **D**, present brain x body scaling relationships shown in **B** predicts that  
300 endothermy was widespread in theropods but only occasional in pterosaurs and ornithischians.  
301

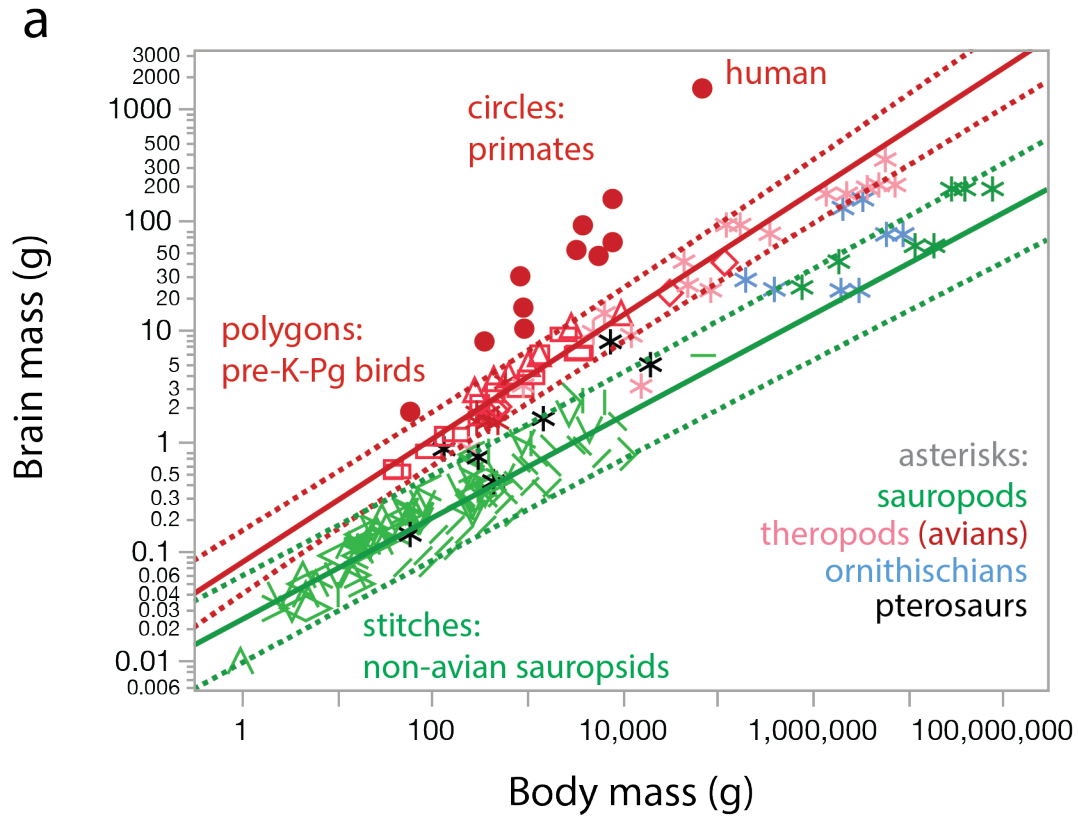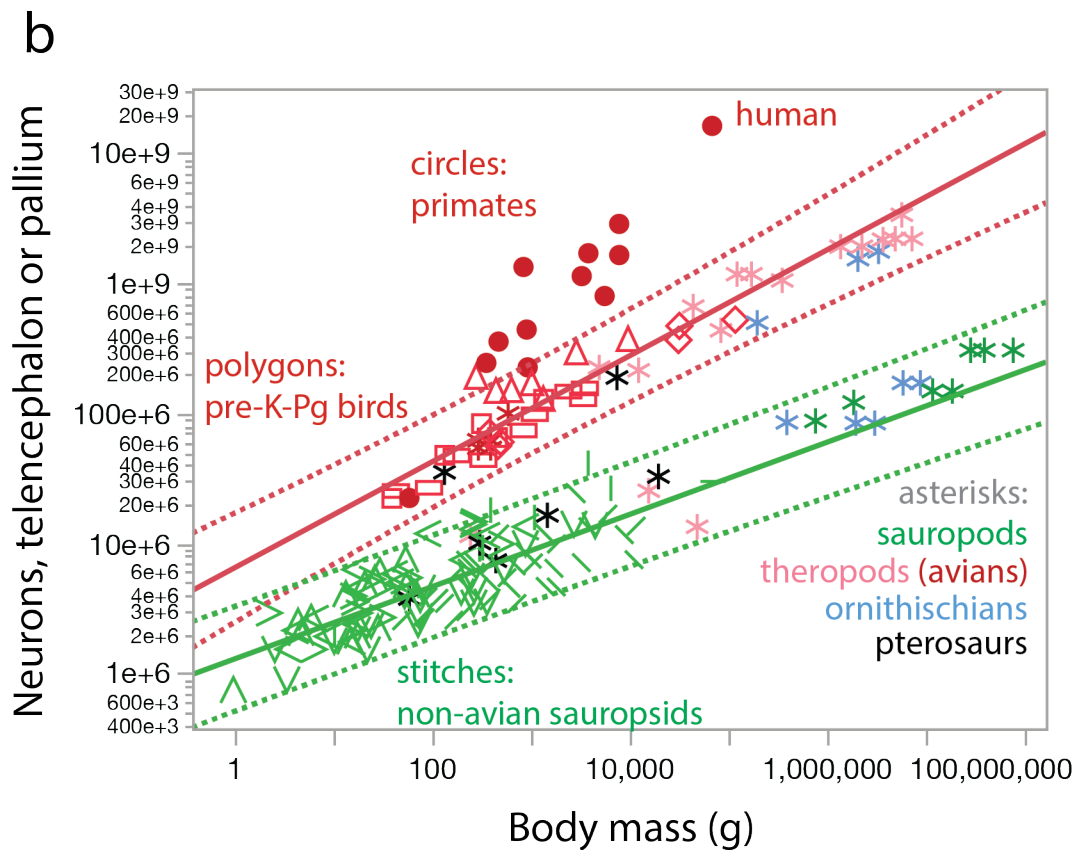

303 **Figure 3. Theropod dinosaurs overlap with modern pre-K-Pg endothermic sauropsids (birds) in their**  
304 **brain x body mass scaling, which results in primate-like numbers of telencephalic neurons in theropods,**  
305 **whereas most sauropodomorphs, pterosaurs and some ornithischians overlap with ectothermic non-**  
306 **avian sauropsids. A,** Data points for fossil species in Table 1 (asterisks) as well as data points for extant  
307 pre-K-Pg bird species (red polygons), extant non-avian sauropsids (green stitches) and primates (red  
308 circles) plotted onto the fitted power functions shown in Figure 1b that describe the brain x body mass  
309 relationship in modern ectothermic sauropsids and pre-K-Pg endothermic sauropsids. Power functions,  
310 plotted with 95% prediction intervals, are the same as in Figure 1b. **B,** Same as in **A,** but showing measured  
311 numbers of neurons in the mammalian cortex or in the telencephalon of extant sauropsids plotted  
312 together with estimated numbers of neurons in the telencephalon of dinosaur and pterosaur species (bold  
313 values in Table 1). Notice the similar numbers of neurons in the telencephalon of theropods and in the  
314 cerebral cortex of primates despite much larger body masses in theropods.

315  
316 Given the striking distinction in brain x body scaling between extant non-avian sauropsids  
317 and pre-K-Pg birds shown in Figure 1, most likely associated with the distinction between  
318 ectothermy and endothermy (Kverkova et al., 2022; Herculano-Houzel, 2022), and the similar  
319 segregation of fossil dinosaur and pterosaur species shown in Figure 2, here I take the approach  
320 of hypothesizing that the neuronal scaling rules calculated for the telencephalon of endothermic  
321 or ectothermic modern species already applied to the brains of fossil species of matching brain  
322 vs body scaling relationship. Thus, considering that most fossil theropods had brains of the mass  
323 expected for a modern pre-K-Pg bird of theropod-like body mass (Figure 2b), the predictive  
324 neuronal scaling rule calculated for modern pre-K-Pg birds will also estimate the numbers of  
325 telencephalic neurons in fossil theropod species of known brain mass.

326 Using the published values of brain mass estimated from CT analysis (Table 1) plotted in  
327 Figure 2, I find that theropods had primate-like numbers of telencephalic neurons (Figure 3B;  
328 Table 1), although in bodies as much as 1,000 times larger than primates of similar numbers of  
329 cortical neurons. As depicted in Figure 4, numbers of telencephalic neurons ranged from just over  
330 1 billion telencephalic neurons in the 73 g brain of *Alioramus*, comparable to a capuchin monkey,  
331 to over 3 billion telencephalic neurons in a 343 g brain of *Tyrannosaurus rex*, which is more  
332 telencephalic neurons than found in a baboon (Herculano-Houzel et al., 2015a). In comparison,

333 scaling with ectothermic sauropsid rules, *Triceratops*, with a 72 g brain similar in size to  
334 *Alioramus*, presumably had only around 172 million telencephalic neurons – fewer than the 306  
335 million neurons found in the cerebral cortex of a capybara (Herculano-Houzel et al., 2015a).  
336 Importantly, the use of endotherm (avian sauropsid) scaling rules to estimate numbers of  
337 telencephalic neurons in theropods versus ectotherm (non-avian sauropsid) scaling rules in  
338 ornithischians is supported by recent metabolite findings in these species (Wiemann et al., 2022).  
339 The distinction is highly consequential: if the *Tyrannosaurus* brain scaled like a non-avian  
340 ectothermic sauropsid brain, it would have an estimated 446 million telencephalic neurons – still  
341 as many as in a large dog, but less than 15% of the baboon-like 3.3 billion telencephalic neurons  
342 estimated if pre-K-Pg bird-like scaling rules applied (Table 1).

343 In pterosaurs, the brain x body relationship in Figure 2b supports the metabolic finding  
344 consistent with endothermy in *Rhamphorhynchus muensteri* (though not in *R. gemmingi*; Table  
345 1), but is consistent with ectothermy in *Pteranodon* (Wiemann et al., 2022). Assuming pre-K-Pg  
346 endothermic sauropsid scaling rules, the 8 kg pterosaur *Anhanguera* had an estimated 189  
347 million telencephalic neurons, fewer than in a marmoset, in a brain of 8 g, which is almost 4 times  
348 as many telencephalic neurons as estimated in the small brain of *Archaeopteryx* (Figure 3). In  
349 contrast, assuming ectothermic sauropsid scaling rules, a 450 g *Pterodactylus* animal had only an  
350 estimated 7 million telencephalic neurons, fewer than found in a mouse, in its 0.4 g brain (Table  
351 1).

352 Comparing the present dataset with the species analyzed in that study of fossil  
353 metabolites (Wiemann et al., 2022), the only disagreement regards *Diplodocus*, the only  
354 sauropodmorph tested in that study, suggested to have elevated oxidative metabolic rates  
355 consistent with endothermy but found here to conform to the brain x body scaling relationship  
356 of modern ectothermic sauropsids. Employing the latter, according to Figure 2b,  
357 sauropodmorphs such as *Brachiosaurus* and *Diplodocus* had only marmoset-like numbers of  
358 telencephalic neurons in their brains, even though these had mass that was similar in range to  
359 the brains of theropods that had estimated monkey-like numbers of telencephalic neurons  
360 (Figure 4, bottom row). Thus, until the metabolite concentrations of sauropodmorph species can  
361 be systematically analyzed in more species, the present data suggest that these large quadrupeds



362 had telencephalons that were composed according to the neuronal scaling rules that still apply  
 363 to modern ectothermic sauropsids – which, incidentally, are the same that apply to modern non-  
 364 primate mammals (Herculano-Houzel, 2022).

365

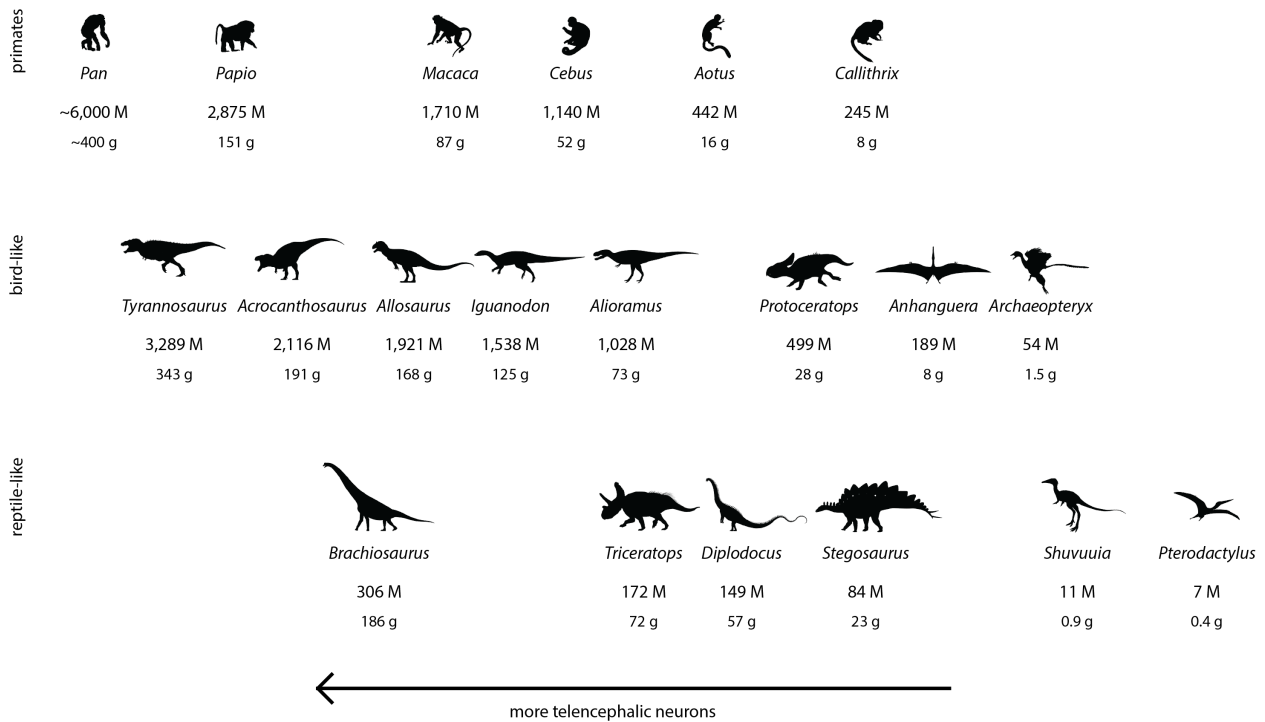

366

367 **Figure 4. Estimates of numbers of telencephalic neurons in dinosaur and pterosaur species.** Values  
 368 below each image are numbers of telencephalic neurons (in millions, M) and brain mass (in grams). Select  
 369 species from the dataset in Table 1 are depicted, ranked from left to right in decreasing order of numbers  
 370 of telencephalic neurons and separated according to whether the species conforms to the brain vs body  
 371 mass relationship of modern (endothermic) pre-K-Pg birds (center row) or of modern non-avian  
 372 (ectothermic) sauropsid species (bottom row). For comparison, select primate species of similar numbers  
 373 of pallial neurons are shown in the top row. All images from phylopic.org.

374

### 375 Discussion

376 Here I show that the scaling relationship between brain and body mass that applies to the  
 377 moderately sized modern bird species originated in pre-K-Pg times still captures the scaling  
 378 relationship that applied to relatively small as well as very large Mesozoic theropods, in an  
 379 extreme example of how biological scaling can be very well described across several orders of

380 magnitude by power functions, which indicate the presence of scale-free, modular, self-  
381 organizing principles at work (Herculano-Houzel et al., 2016; West, 2017). Importantly, the  
382 overlap between extinct theropods and extant pre-K-Pg birds strongly suggests that theropods  
383 were endothermic. Similarly, I find that the brain x body mass scaling relationship of most species  
384 of sauropodomorph and ornithischian dinosaurs, as well as pterosaurs, is captured by the scaling  
385 relationship that applies to modern ectothermic sauropsids, which suggests that those species of  
386 dinosaurs were ectothermic, or if they were endothermic, they had not yet expressed the  
387 enlarged brain mass that is presumably affordable by the increased oxidative capacity that  
388 powers endothermy (Herculano-Houzel, 2022). However, it remains possible that the values  
389 presented here for sauropodomorphs and ornithischians are underestimated, since they stem  
390 from a dataset that considered that the brain of these species only filled 50% of the cranial cavity  
391 (Hurlburt, 1996); likewise, it is possible that the values for theropods are slightly overestimated,  
392 since they assume that in these species, the brain fills the cranial cavity (Balanoff et al., 2013;  
393 Witmer et al., 2003).

394 On a related note, I acknowledge that the nomenclature and quite possibly some of the  
395 data provided in Table 1 from the original data of Hurlburt (1996) are outdated, especially those  
396 pertaining to sauropodomorphs and ornithischians. I provide those data as initial estimates for  
397 non-Theropod species, and maintain the outdated names as in the original dataset, so that those  
398 data can be easily located by future researchers, whom I hope will carry this study forward with  
399 modern data.

400 Another methodological issue that will be disputed by some readers is that the scaling  
401 relationships reported here are not “corrected” for phylogenetic relatedness, as detailed in the  
402 Methods. The central issue of the present study, as in all my previous work, is the scaling  
403 relationship between physical quantities such as brain structure mass and numbers of cells and  
404 how one predicts the other in different ways in different clades. Whereas phylogenetic  
405 comparative methods were initially introduced to alleviate issues with bias possibly introduced  
406 by evolutionary relatedness in a sample, I have previously shown that any differences in the  
407 scaling exponents calculated with and without accounting for phylogenetic relatedness differ by  
408 only 1-2%, which is not a statistically significant difference, provided that there is no mixing in

409 the sample of species from clades already found to scale differently (Gabi et al., 2010; Herculano-  
410 Houzel et al., 2011). Moreover, phylogenetic relationships are constantly being updated as  
411 research progresses, which would affect the predictive scaling rules calculated if relatedness  
412 within each clade were taken into consideration. This is another reason why I continue to prefer  
413 to report only the scaling relationships that apply to the raw data (Herculano-Houzel et al.,  
414 2015a). These mathematical functions will be readily useful to researchers interested in the  
415 relationships between the physical entities involved; other researchers interested in the  
416 phylogenetic signal possibly contained within the raw data provided are welcome to apply in their  
417 own studies to further phylogenetic studies of evolution, which are not at all the focus of the  
418 present work.

419 A still growing number of studies have focused on establishing whether dinosaurs were  
420 ectotherms, mesotherms, or had the high metabolic rates characteristic of modern warm-  
421 blooded animals, and the fast-paced behavior and life history that come with it (Werner and  
422 Griebeler, 2014; Grady et al., 2014; Wiemann et al., 2022). The present findings on the diverse  
423 scaling of brain x body mass across dinosaur clades, which are compatible with endothermy in  
424 some and ectothermy in other species, add to the still-going debate about the metabolic  
425 condition of fossil dinosaurs by disputing the claim of homogeneous mesothermy across species  
426 (Grady et al., 2014) in favor of much larger diversity than previously suspected, supporting the  
427 finding that higher metabolic rates appeared in some but not all dinosaur clades (Wiemann et  
428 al., 2022). Specifically, while most theropods and the single sauropodmorph (*Diplodocus*) tested  
429 had advanced lipoxidation end-products accumulated in quantities indicative of high metabolic  
430 rates, different ornithischian and pterosaur species showed concentrations compatible with  
431 either high or low metabolic rates (Wiemann et al., 2022). So much diversity amongst dinosaurs  
432 and pterosaurs in both metabolism and brain x body scaling (Figure 2b) warrants discontinuation  
433 of the practice of treating these species as a mixed bag in scaling studies. Instead of using all-  
434 encompassing scaling rules such as the power function shown in Figure 2c, clade-specific analyses  
435 and scaling rules should be employed, informed by other features such as analysis of metabolites  
436 (Wiemann et al., 2022), which suggests the clustering indicated by the colors in Figure 2c, or by

437 the scaling relationship between brain and body mass, which suggests the clustering indicated  
438 by the colors in Figure 2d.

439 As modeling techniques based on micro-CT data improve and allow the volume of other  
440 brain structures to be estimated (Knoll et al., 2021), more evidence should help distinguish which  
441 dinosaur and pterosaur species were ecto- or endothermic. The cerebellum, for example, is  
442 decidedly larger in extant endothermic species compared to ectothermic species of similar body  
443 mass (Kverkova et al., 2022); thus, the size of the cerebellum relative to the mass of the  
444 telencephalon (Herculano-Houzel, 2022) and of the body may serve as a new diagnostic criterion  
445 to infer the metabolic status of species of the prehistoric fauna. Importantly, this is not a  
446 difference of 10-20%, but of 10-20 times in volume of the cerebellum relative to the brainstem  
447 between living endothermic and ectothermic amniotes; therefore, models and simulations that  
448 estimate the volume of the cerebellum in fossil animals of unknown metabolic status would  
449 greatly contribute not only to understanding cerebellar evolution, but also to determining their  
450 metabolic status. Still, absent volumetric analyses of the cerebellum, simply determining whether  
451 the brain vs body mass relationship clusters with endothermic, pre-K-Pg birds or with  
452 ectothermic sauropsids, as more fossil species have their brain and body masses estimated,  
453 should already provide diagnostic evidence of the metabolic status of those species.

454 Estimating the numbers of neurons in the telencephalon, whose main component is the  
455 pallium, a major contributor to behavioral flexibility, is obviously consequential for inferring the  
456 cognitive capabilities of dinosaur species, whatever their body size (Herculano-Houzel, 2017). The  
457 present estimates showing that apex predators such as *Tyrannosaurus* had the numbers of  
458 telencephalic neurons found in modern medium-sized primates of impressive cognitive abilities  
459 adds a new dimension to how dinosaurs are pictured; an elephant-sized but agile carnivoran  
460 biped endowed with macaque- or baboon-like cognition must have been an extremely  
461 competent predator indeed. But additionally, I showed recently that the number of neurons in  
462 the pallium is a true and reliable predictor of age at sexual maturity and maximal longevity in  
463 warm-blooded animals (Herculano-Houzel, 2019a), such that 74% of variation in these life-history  
464 variables can be predicted in mammals and birds alike simply by the absolute number of neurons  
465 in the cerebral cortex, whereas body mass is an irrelevant predictor once numbers of cortical

466 neurons are accounted for (Herculano-Houzel, 2019a). Using the reported equations  $L = e^{-4.939}$   
467  $N_{cx}^{0.402}$  and  $S = e^{-2.858} N_{cx}^{0.471}$  that relate maximal longevity (L) and age at female sexual maturity  
468 (S), respectively, to numbers of cortical neurons ( $N_{cx}$ ; Herculano-Houzel, 2019), and assuming  
469 that most telencephalic neurons in sauropsids are pallial (Kverkova et al., 2022), I can predict that  
470 a warm-blooded *Tyrannosaurus* of 2.2-3.3 billion telencephalic neurons would take 4-5 years to  
471 reach sexual maturity, and have an estimated maximal longevity of 42-49 years, similar to  
472 baboons, whereas *Archaeopteryx* should reach sexual maturity in ca. 8 months, and have a  
473 maximal lifespan of 10 years, similar to flycatchers and other songbirds (Herculano-Houzel,  
474 2019). In support of this estimate based on extant warm-blooded species, the survivorship  
475 pattern of tyrannosaurs is similar to that seen in long-lived, mammals and birds (Erickson et al.,  
476 2006). The predicted sexual maturity of *Tyrannosaurus* at age 5 years, like in modern warm-  
477 blooded amniotes of similar numbers of cortical neurons, anticipates by a full decade the  
478 previous demonstration that, at 18 years of age, this species was sexually mature (although that  
479 was admittedly an upper bound; Lee and Werning, 2008). While the largest and oldest known *T.*  
480 *rex* lived an estimated 28 years, well under the predicted maximal longevity, the finding that only  
481 2% of the population lived long enough to attain maximal size and age for the species (Erickson  
482 et al., 2006) makes the estimate of a maximal lifespan of just over 40 years compatible with the  
483 oldest known fossil.

484 Through their association with delayed sexual maturity and longer lifespans, larger  
485 numbers of telencephalic neurons simultaneously endow brains with the cognitive flexibility that  
486 can be construed as intelligence (Herculano-Houzel, 2017) and come with increased lifetime  
487 opportunities to develop that increased biological signal processing capability into abilities such  
488 as using and creating tools, and devising and perpetuating problem-solving processes  
489 (Herculano-Houzel, 2019b). With enough pallial neurons and a long enough lifetime that comes  
490 with it, generations overlap enough that developed abilities can be transmitted and perpetuated,  
491 forming a body of technology and culture that characterizes populations (Herculano-Houzel,  
492 2019b). The present findings invite the speculation that theropod dinosaurs such as *T. rex*, with  
493 even more telencephalic neurons than modern tool-using and tool-making corvids (Olkowicz et  
494 al., 2016), had the biological capability to use and craft tools, and develop a culture, like modern

495 birds and primates (Beck, 1974; Whiten et al., 1999; Sapolsky and Share, 2004; von Bayern et al.,  
496 2018). Being able to infer what existed inside the brains of dinosaurs thus multiplies in several  
497 directions our knowledge of what life was like in the pre-asteroid, Mesozoic world, and places at  
498 least theropods, if not other dinosaurs as well, in the cognitive realm of tool-using and culture-  
499 building modern birds and primates.

500

501

502

### 503 **References**

504

505 Alvarez LW, Alvarez W, Asaro F, Michel HV (1980) Extraterrestrial cause for the Cretaceous-  
506 Tertiary extinction. *Science* 208, 1095-1108.

507 Balanoff AM, Bever GS, Rowe TS, Norell MA (2013) Evolutionary origins of the avian brain.  
508 *Nature* 501, 93-97.

509 Beck BB (1974) Baboons, chimpanzees, and tools. *J Human Evol* 3, 509-516.

510 Bennett AF, Ruben JA (1979) Endothermy and activity in vertebrates. *Science* 206, 649-655.

511 Bertrand OC, Shelley SL, Williamson TE, Wible JR, Chester SGB, Flynn JJ, Holbrook LT, Lyson  
512 TR, Meng J, Miller IM, Püschel HP, Smith T, Spaulding M, Tseng ZJ, Brusatte SL (2022) Brawn  
513 before brains in placental mammals after the end-Cretaceous extinction. *Science* 376, 80-85.

514 Bininda-Emonds ORP, Cardillo M, Jones KE, MacPhee RDE, Beck RMD, Grenyer R et al. (2007)  
515 The delayed rise of present-day mammals. *Nature* 446, 507-512.

516 Boot N, Baas M, van Gaal S, Cools R, de Dreu CKW (2017) Creative cognition and dopaminergic  
517 modulation of fronto-striatal networks: Integrative review and research agenda. *Neurosci*  
518 *Biobehav Rev* 78, 13-23.

519 Brusatte SL, O'Connor JK, Jarvis ED (2015) The origin and diversification of birds. *Curr Biol* 25,  
520 R888-898.

- 521 Erickson GM, Currie PJ, Inouye BD, Winn AA (2006) Tyrannosaur life tables: an example of  
522 nonavian dinosaur population biology. *Science* 313, 213-218.
- 523 Gabi M, Collins CE, Wong P, Kaas JH, Herculano-Houzel S (2010) Cellular scaling rules for the  
524 brain of an extended number of primate brains. *Brain Behav Evol* 76, 32-44.
- 525 Gillooly JF, McCoy MW (2014) Brain size varies with temperature in vertebrates. *PeerJ* 2,  
526 e301.
- 527 Grady JM, Enquist BJ, Dettweiler-Robinson E, Wright NA, Smith FA (2014) Evidence for  
528 mesothermy in dinosaurs. *Science* 344, 1268-1273.
- 529 Herculano-Houzel S (2016) What modern mammals teach about the cellular composition of  
530 early brains and mechanisms of brain evolution. In Kaas JH, Krubitzer L eds., *Evolution of*  
531 *Nervous Systems*, 2<sup>nd</sup> ed., vol. 2, 153-190.
- 532 Herculano-Houzel S (2017) Numbers of neurons as biological correlates of cognitive  
533 capability. *Curr Opin Behav Sci* 16, 1-7.
- 534 Herculano-Houzel S (2019a) Longevity and sexual maturity vary across species with number  
535 of cortical neurons, and humans are no exception. *J Comp Neurol* 527, 1689-1705.
- 536 Herculano-Houzel S (2019b) Life history changes accompany increased numbers of cortical  
537 neurons: a new framework for understanding brain evolution. *Prog Brain Res* 250, 179-216.
- 538 Herculano-Houzel S (2022) Mammals, birds and non-avian reptiles have signature  
539 proportions of numbers of neurons across their brain structures: Numbers of neurons  
540 increased differently with endothermy in birds and mammals. [bioRxiv.org, 2022/496835](https://doi.org/10.1101/2022.06.20.496834).
- 541 Herculano-Houzel S, Lent R (2005) Isotropic fractionator: a simple, rapid method for the  
542 quantification of total cell and neuron numbers in the brain. *J Neurosci* 25, 2518-2521.
- 543 Herculano-Houzel S, Kaas JH (2011) Gorilla and orangutan brains conform to the primate  
544 scaling rules: implications for hominin evolution. *Brain Behav Evol* 77, 33-44.

- 545 Herculano-Houzel S, Ribeiro P, Campos L, da Silva AV, Torres LB, Catania KC, Kaas JH (2011)  
546 Updated neuronal scaling rules for the brains of glires (rodents/lagomorphs). *Brain Behav*  
547 *Evol* 78, 302-314.
- 548 Herculano-Houzel S, Ribeiro PFM, Campos L, da Silva AV, Torres LB, Catania KC, Kaas JH (2011)  
549 Updated neuronal scaling rules for the brains of Glires (rodents/lagomorphs). *Brain Behav*  
550 *Evol* 78, 302-314.
- 551 Herculano-Houzel S, Manger PR, Kaas JH (2014) Brain scaling in mammalian brain evolution  
552 as a consequence of concerted and mosaic changes in numbers of neurons and average  
553 neuronal cell size. *Front Neuroanat* 8, 77.
- 554 Herculano-Houzel S, Catania K, Manger PR, Kaas JH (2015a) Mammalian brains are made of  
555 these: a dataset on the numbers and densities of neuronal and non-neuronal cells in the brain  
556 of glires, primates, scandentia, eulipotyphlans, afrotherians and artiodactyls, and their  
557 relationship with body mass. *Brain Behav Evol* 86, 145-163.
- 558 Herculano-Houzel S, Kaas JH, Miller D, Von Bartheld CS (2015b) How to count cells: the  
559 advantages and disadvantages of the isotropic fractionator compared with stereology. *Cell*  
560 *Tissue Res* 360, 29-42.
- 561 Hopson JA (1977) Relative brain size and behavior in archosaurian reptiles. *Annu Rev Ecol*  
562 *Systematics* 8, 429-448.
- 563 Hulburt GR (1996) Relative brain size in recent and fossil amniotes: Determination and  
564 interpretation. PhD Thesis, University of Toronto.
- 565 Hulburt GR, Ridgely RC, Witmer LM (2013) Relative size of brain and cerebrum in  
566 Tyrannosaurid dinosaurs: an analysis using brain-endocast quantitative relationships in  
567 extant alligators. In Parrish JM, Molnar RE, Currie PJ, Koppelhus EB (eds), *Tyrannosaurid*  
568 *paleobiology*. Indiana University Press, Bloomington, 134-154.
- 569 Jerison HJ (1973) *Evolution of the brain and intelligence*. New York, Academic Press.



- 570 Knoll F, Buffetaut E, Bülow M (1999) A theropod braincase from the Jurassic of the Vaches  
571 Noires cliffs (Normandy, France): osteology and palaeoneurology. Bull Soc Geol France 170,  
572 103-109.
- 573 Knoll F, Schwarz-Wings D (2009) Palaeoneuroanatomy of Brachiosaurus. Annales Paléontol  
574 95, 165-175.
- 575 Knoll, F., S. Lautenschlager, S. Kawabe, G. Martínez, E. Espílez, L. Mampel, & L. Alcalá. 2021.  
576 Palaeoneurology of the Early Cretaceous iguanodont *Proa valdearinnoensis* and its bearing on the  
577 parallel developments of cognitive abilities in theropod and ornithopod dinosaurs. Journal of  
578 Comparative Neurology, 529 (18): 3922–3945.
- 579 Knoll, F., S. Kawabe & A. Watanabe (2022) A proxy for brain-to-endocranial cavity index in non-  
580 neornithean dinosaurs and other extinct archosaurs. 10th European Conference on Comparative  
581 Neurobiology, Abstract Book. 33. Eds: P. Němec, K. Kverková, Y. Zhang, F. Dionigi, R. Druga & G.  
582 Pavlinkova. Praha: Univerzita Karlova.
- 583 Ksepka DT, Balanoff AM, Smith NA, Bever GS, Bhullar B-AS, Bourdon E et al. (2020) Tempo  
584 and pattern of avian brain size evolution. Curr Biol 30, 2026-2036.
- 585 Kverkova K, Marhounová L, Polonyiová A, Kocourek M, Zhang Y, Olkowicz S, Stratková B,  
586 Pavelková Z, Vodicka R, Frynta D, Nemeč P (2022) The evolution of brain neuron numbers in  
587 amniotes. Proc Natl Acad Sci USA 119, e2121624119.
- 588 Lee AH, Werning S (2008) Sexual maturity in growing dinosaurs does not fit reptilian growth  
589 models. Proc Natl Acad Sci USA 105, 582-587.
- 590 Olkowicz S, Kocourek M, Lucan RK, Portes M, Fitch WT, Herculano-Houzel S, Nemeč P (2016)  
591 Birds have primate-like numbers of neurons in the telencephalon. Proc Natl Acad Sci USA 113,  
592 7255-7260.
- 593 Rowe TB, Macrini TR, Luo Z-X (2011) Fossil evidence on origin of the mammalian brain.  
594 Science 332, 955-957.

- 595 Sapolsky RM, Share LJ (2004) A pacific culture among wild baboons: its emergence and  
596 transmission. *PLoS Biol* 2, e106.
- 597 Sol D, Olkowicz S, Sayol F, Kocourek M, Zhang Y, Marhounová L, Osadnik C, Corssmit E, Garcia-  
598 Porta J, Martin TE, Lefebvre L, Nemeč P (2022) Neuron numbers link innovativeness with both  
599 absolute and relative brain size in birds. *Nature Ecol Evol*, doi.org/10.1038/s41559-022-  
600 01815-x.
- 601 Ströckens F, Neves K, Kirchem S, Schwab C, Herculano-Houzel S, Güntürkün O (2022) High  
602 associative neuron numbers could drive cognitive performance in corvid species. *J Comp*  
603 *Neurol* 530, 1588-1605.
- 604 Von Bayern AMP, Danel S, Auersperg AMI, Mioduszezewska B, Kacelnik A (2018) Compound  
605 tool construction by New Caledonian crows. *Scientific Reports* 8, 15676.
- 606 Werner J, Griebeler EM (2014) Allometries of maximum growth rate versus body mass at  
607 maximum growth indicate that non-avian dinosaurs had growth rates typical of fast growing  
608 ectothermic sauropsids. *PLoS One* 9, e88834.
- 609 West G (2017) *Scale: The universal laws of growth, innovation, sustainability, and the pace of*  
610 *life in organisms, cities, economies, and companies*. Penguin Press, New York.
- 611 Whiten A, Goodall J, McGrew WC, Nishida T, Reynolds V, Sugiyama Y, Tutin CEG, Wrangham  
612 RW, Boesch C (1999) Cultures in chimpanzees. *Nature* 399, 682-685.
- 613 Wiemann J, Menéndez I, Crawford JM, Fabbri M, Gauthier JA, Hull PM, Norell MA, Briggs DEG  
614 (2022) Fossil biomolecules reveal an avian metabolism in the ancestral dinosaur. *Nature*,  
615 <https://doi.org/10.1038/s41586-022-04770-6>.
- 616 Williams RW, Herrup K (1980) The control of neuron number. *Annu Rev Neurosci* 11, 423-  
617 253.
- 618 Witmer LM, Chatterjee S, Franzosa J, Rowe T (2003) Neuroanatomy of flying reptiles and  
619 implications for flight, posture and behaviour. *Nature* 425, 950-953.

620 Yu Y, Zhang C, Xu X (2021) Deep time diversity and the early radiations of birds. Proc Natl  
621 Acad Sci USA 118, e2019865118.

622  
623

## 624 Acknowledgements

625 Thanks to Pavel Nemeč and collaborators who collected the reptilian data that made this  
626 study possible, and to Fabien Knoll and another reviewer who remained anonymous for greatly  
627 improving this manuscript. This work was not supported by any type of funding.

628

629 **Competing interests: None.**

630

631 **All correspondence and material requests should be addressed to the author at the address**  
632 **above.**

633

634 **Table 1. Dataset and numbers of telencephalic neurons ( $N_{tel}$ ) in dinosaur and pterosaur species**  
635 **predicted from brain mass ( $M_{br}$ ) estimates reported in the literature.** For the sake of clarity and  
636 reproducibility, all data compiled are listed, instead of calculating averages for each species, and  
637 are plotted in Figure 2a,b. For each species, estimated  $N_{tel}$  (in millions, M) are shown calculated  
638 according to the scaling relationships  $N_{tel} = e^{17.518} M_{br}^{0.753}$  (for endothermic, basal birds) and  $N_{tel}$   
639  $= e^{16.342} M_{br}^{0.612}$  (for ectothermic reptiles; Figure 1c).  $M_{bd}$ , body mass in grams;  $M_{br}$ , brain mass in  
640 grams, converted from estimated brain volume in  $cm^3$  using  $1\text{ cm}^3 = 1\text{ g}$ . Source of  $M_{bd}$  and  $M_{br}$   
641 data is indicated next to each species (*a*, Witmer et al., 2003; *b*, Hurlburt, 1996; *c*, Hurlburt et al.,  
642 2013; *d*, Balanoff et al., 2013). Values of  $N_{tel}$  in bold are the predictions according to Figure 2b.

643

| Species                                              | $M_{bd}$ , g | $M_{br}$ , g | $N_{tel}$ if ectothermic | $N_{tel}$ if endothermic | S (days), endothermic | $L_{max}$ (years), endothermic |
|------------------------------------------------------|--------------|--------------|--------------------------|--------------------------|-----------------------|--------------------------------|
| <b>Pterosaurs</b>                                    |              |              |                          |                          |                       |                                |
| <i>Anhanguera piscator</i> (AMNH 25555) <sup>a</sup> | 7,600        | 7.720        | 43.7 M                   | <b>188.9 M</b>           | 454                   | 16                             |
| <i>Pterodactylus kochi</i> <sup>b</sup>              | 450          | 0.420        | <b>7.4 M</b>             | 21.1 M                   | 162                   | 7                              |
| <i>Pterodactylus elegans</i> <sup>b</sup>            | 60           | 0.140        | <b>3.8 M</b>             | 9.2 M                    | 109                   | 5                              |
| <i>Pteranodon</i> <sup>b</sup>                       | 20,000       | 4.800        | <b>32.7 M</b>            | 132 M                    | 383                   | 14                             |
| <i>Rhamphorynchus gemmingi</i> <sup>b</sup>          | 310          | 0.700        | <b>10.0 M</b>            | 31.0 M                   | 194                   | 8                              |

|                                                             |            |        |                |                |       |    |
|-------------------------------------------------------------|------------|--------|----------------|----------------|-------|----|
| <i>Rhamphorynchus muensteri</i> (CM 11434) <sup>a</sup>     | 136        | 0.830  | 11.2 M         | <b>35.2 M</b>  | 206   | 8  |
| <i>Scaphognathus purdoni</i> <sup>b</sup>                   | 1,500      | 1.560  | <b>16.4 M</b>  | 56.7 M         | 257   | 10 |
| <b>Ornithischians</b>                                       |            |        |                |                |       |    |
| <i>Anatosaurus</i> <sup>b</sup>                             | 3,400,000  | 150.0  | 268.5 M        | <b>1,764 M</b> | 1,300 | 38 |
| <i>Camptosaurus</i> <sup>b</sup>                            | 400,000    | 23.0   | <b>85.2 M</b>  | 429.9 M        | 668   | 22 |
| <i>Euoplocephalus</i> <sup>b</sup>                          | 1,900,000  | 41.0   | <b>121.4 M</b> | 664.4 M        | 821   | 26 |
| <i>Iguanodon</i> <sup>b</sup>                               | 2,100,000  | 125.0  | 240.2 M        | <b>1,538 M</b> | 1,219 | 36 |
| <i>Kentrosaurus</i> <sup>b</sup>                            | 780,000    | 24.0   | <b>87.5 M</b>  | 443.9 M        | 679   | 22 |
| <i>Protoceratops</i> <sup>b</sup>                           | 200,000    | 28.0   | <b>96.1 M</b>  | 498.5 M        | 717   | 23 |
| <i>Stegosaurus</i> <sup>b</sup>                             | 3,100,000  | 22.5   | <b>84.1 M</b>  | 422.8 M        | 663   | 22 |
| <i>Stegosaurus</i> <sup>b</sup>                             | 2,000,000  | 22.5   | <b>84.1 M</b>  | 422.8 M        | 663   | 22 |
| <i>Triceratops</i> <sup>b</sup>                             | 9,000,000  | 72.2   | <b>171.7 M</b> | 1,017 M        | 1,003 | 31 |
| <i>Triceratops</i> <sup>b</sup>                             | 6,000,000  | 72.2   | <b>171.7 M</b> | 1,017 M        | 1,003 | 31 |
| <b>Sauropodmorphs</b>                                       |            |        |                |                |       |    |
| <i>Brachiosaurus</i> <sup>b</sup>                           | 78,300,000 | 186.0  | <b>306.3 M</b> | 2,075 M        | 1,403 | 41 |
| <i>Brachiosaurus</i> <sup>b</sup>                           | 40,000,000 | 186.0  | <b>306.3 M</b> | 2,075 M        | 1,403 | 41 |
| <i>Brachiosaurus</i> <sup>b</sup>                           | 29,000,000 | 186.0  | <b>306.3 M</b> | 2,075 M        | 1,403 | 41 |
| <i>Diplodocus</i> <sup>b</sup>                              | 19,000,000 | 57.0   | <b>148.5 M</b> | 851.4 M        | 922   | 29 |
| <i>Diplodocus</i> <sup>b</sup>                              | 12,000,000 | 57.0   | <b>148.5 M</b> | 851.4 M        | 922   | 29 |
| <b>Theropods</b>                                            |            |        |                |                |       |    |
| <i>Acrocanthosaurus atokensis</i> (OMNH 10146) <sup>d</sup> | 3,770,000  | 191.0  | 311.3 M        | <b>2,116 M</b> | 1,416 | 41 |
| <i>Alioramus altai</i> (IGM 100/1184) <sup>d</sup>          | 359,000    | 73.2   | 173.2 M        | <b>1,028 M</b> | 1,008 | 31 |
| <i>Allosaurus</i> <sup>b</sup>                              | 2,300,000  | 168.0  | 287.8 M        | <b>1,921 M</b> | 1,353 | 40 |
| <i>Allosaurus</i> <sup>b</sup>                              | 1,400,000  | 168.0  | 287.8 M        | <b>1,921 M</b> | 1,353 | 40 |
| <i>Bambiraptor</i> <sup>c</sup>                             | 6,582      | 14.0   | 62.9 M         | <b>295.8 M</b> | 561   | 19 |
| <i>Citipati osmolskae</i> (IGM 100/978) <sup>d</sup>        | 85,960     | 22.620 | 84.4 M         | <b>424.5 M</b> | 665   | 22 |
| <i>Conchoraptor gracilis</i> (IGM 100/3006) <sup>d</sup>    | 5,020      | 9.440  | 49.4 M         | <b>219.8 M</b> | 487   | 17 |
| <i>Dromicioemimus</i> <sup>b</sup>                          | 175,000    | 87.85  | 193.6 M        | <b>1,179 M</b> | 1,075 | 33 |
| <i>Dromicioemimus</i> <sup>b</sup>                          | 125,000    | 87.85  | 193.6 M        | <b>1,179 M</b> | 1,075 | 33 |
| <i>Khaan mckennai</i> (IGM 100/973) <sup>d</sup>            | 12,610     | 8.830  | 47.4 M         | <b>209.1 M</b> | 476   | 17 |
| <i>Shuvuuia deserti</i> (IGM 100/977) <sup>d</sup>          | 250        | 0.830  | <b>11.2 M</b>  | 35.2 M         | 206   | 8  |
| <i>Troodon</i> <sup>b</sup>                                 | 45,000     | 41.0   | 121.4 M        | <b>664.4 M</b> | 821   | 26 |

|                                                              |           |       |               |                |       |    |
|--------------------------------------------------------------|-----------|-------|---------------|----------------|-------|----|
| Troodontid (IGM 100/1126) <sup>d</sup>                       | 920       | 3.110 | 25.1 M        | <b>95.3 M</b>  | 329   | 12 |
| <i>Tsaagan mangas</i> (IGM 100/1015) <sup>d</sup>            | 15,950    | 3.070 | <b>24.9 M</b> | 94.4 M         | 327   | 12 |
| <i>Tyrannosaurus</i> <sup>b</sup>                            | 7,400,000 | 202.0 | 322.2 M       | <b>2,207 M</b> | 1,445 | 42 |
| <i>Tyrannosaurus</i> <sup>b</sup>                            | 5,000,000 | 202.0 | 322.2 M       | <b>2,207 M</b> | 1,445 | 42 |
| <i>Tyrannosaurus rex</i> (AMNH 5029) <sup>d</sup>            | 5,840,000 | 343   | 445.5 M       | <b>3,289 M</b> | 1,743 | 49 |
| <i>Zanabazar junior</i> (IGM 100/1) <sup>d</sup>             | 49,300    | 25.14 | 90.0 M        | <b>459.7 M</b> | 690   | 23 |
| <b>Aves</b>                                                  |           |       |               |                |       |    |
| <i>Archaeopteryx</i> <sup>b</sup>                            | 400       | 1.470 | 15.8 M        | <b>54.2 M</b>  | 252   | 10 |
| <i>Archaeopteryx</i> <sup>b</sup>                            | 300       | 1.470 | 15.8 M        | <b>54.2 M</b>  | 252   | 10 |
| <i>Archaeopteryx</i> <sup>b</sup>                            | 400       | 1.760 | 17.7 M        | <b>62.1 M</b>  | 269   | 10 |
| <i>Archaeopteryx</i> <sup>b</sup>                            | 300       | 1.760 | 17.7 M        | <b>62.1 M</b>  | 269   | 10 |
| <i>Archaeopteryx lithographica</i> (BMNH 37001) <sup>d</sup> | 500       | 1.440 | 15.6 M        | <b>53.4 M</b>  | 250   | 10 |
| Unnamed protoavis <sup>b</sup>                               | 600       | 3.320 | 26.1 M        | <b>100.1 M</b> | 336   | 13 |

644
